# Supplementary material
Source: MDPI journal article supplement (https://www.mdpi.com/2073-4395/13/3/825)
Supplement: s1 [file s1]

Supplementary materials

Table S1 The  $\alpha$ -diversity of bacteria and fungi in bulk soil under different farming modes.

| Farming        | Variety        | $\alpha$ -diversity of bulk soil |        |         |         |          |       |         |         |
|----------------|----------------|----------------------------------|--------|---------|---------|----------|-------|---------|---------|
|                |                | Bacteria                         |        |         |         | Fungi    |       |         |         |
|                |                | Richness                         | Chao1  | Shannon | Simpson | Richness | Chao1 | Shannon | Simpson |
| M <sup>‡</sup> | H <sup>‡</sup> | 2715.3                           | 2716.7 | 8.91    | 0.009   | 512.7    | 514.1 | 8.91    | 0.095   |
| M <sup>‡</sup> | C <sup>‡</sup> | 2734.7                           | 2736.1 | 9.08    | 0.006   | 401.3    | 403.0 | 9.08    | 0.108   |
| R <sup>‡</sup> | H <sup>‡</sup> | 2797.3                           | 2798.9 | 9.02    | 0.007   | 424.7    | 426.5 | 9.01    | 0.049   |
| R <sup>‡</sup> | C <sup>‡</sup> | 3129.7                           | 3131.0 | 9.38    | 0.005   | 455.7    | 457.4 | 9.38    | 0.052   |

<sup>‡</sup> The M, R, H, and C represent monoculture mode, rotation mode, rot-conducive variety, and rot-suppressive variety, respectively.

Different letters indicate a significant difference at p<0.05.

Table S2. The keystone taxa of bacteria in rhizosphere of different varieties

|                         |          | Phylum          | Class               | Order                 | Family                 | Genus           | Species              |
|-------------------------|----------|-----------------|---------------------|-----------------------|------------------------|-----------------|----------------------|
| Rot-suppressive variety | OTU_145  | Patescibacteria | Saccharimonadia     | Saccharimonadales     |                        |                 |                      |
|                         | OTU_150  | Bacteroidetes   | Bacteroidia         | Chitinophagales       | Saprospiraceae         | uncultured      |                      |
|                         | OTU_170  | Acidobacteria   | Thermoanaerobaculia | Thermoanaerobaculales | Thermoanaerobaculaceae | Subgroup_10     |                      |
|                         | OTU_334  | Chloroflexi     | Anaerolineae        |                       |                        |                 |                      |
|                         | OTU_405  | Proteobacteria  | Gammaproteobacteria | Xanthomonadales       | Xanthomonadaceae       | Lysobacter      |                      |
|                         | OTU_530  | Planctomycetes  | Phycisphaerae       | Phycisphaerales       | Phycisphaeraceae       | AKYG587         |                      |
| Rot-conductive variety  | OTU_139  | Proteobacteria  | Alphaproteobacteria | Tistrellales          | Geminicoccaceae        | uncultured      | uncultured_bacterium |
|                         | OTU_1558 | Bacteroidetes   | Bacteroidia         | Sphingobacteriales    | Sphingobacteriaceae    | Pedobacter      |                      |
|                         | OTU_205  | Chloroflexi     | Anaerolineae        | Anaerolineales        | Anaerolineaceae        | uncultured      |                      |
|                         | OTU_337  | Bacteroidetes   | Bacteroidia         | Cytophagales          | Hymenobacteraceae      | Adhaeribacter   | uncultured_bacterium |
|                         | OTU_35   | Actinobacteria  | Acidimicrobiia      | Actinomarinales       | uncultured             |                 |                      |
|                         | OTU_3803 | Bacteroidetes   | Bacteroidia         | Chitinophagales       | Chitinophagaceae       |                 |                      |
|                         | OTU_551  | Bacteroidetes   | Bacteroidia         | Chitinophagales       | Chitinophagaceae       | Ferruginibacter | uncultured_bacterium |
|                         | OTU_665  | Proteobacteria  | Deltaproteobacteria | Myxococcales          |                        |                 |                      |
|                         | OTU_750  | Proteobacteria  | Deltaproteobacteria | Myxococcales          | P3OB-42                |                 |                      |
|                         | OTU_81   | Bacteroidetes   | Bacteroidia         | Cytophagales          | Hymenobacteraceae      | Adhaeribacter   |                      |

Table S3. The keystone taxa of fungi in rhizosphere of different varieties

|                         |          | Kingdom   | Phylum        | Class           | Order          | Family            | Genus          | Species                 |
|-------------------------|----------|-----------|---------------|-----------------|----------------|-------------------|----------------|-------------------------|
| Rot-suppressive variety | OTU_1076 | Fungi     |               |                 |                |                   |                |                         |
|                         | OTU_1103 | Fungi     | Glomeromycota | Glomeromycetes  |                |                   |                |                         |
|                         | OTU_1349 | Fungi     | Ascomycota    | Eurotiomycetes  |                |                   |                |                         |
|                         | OTU_1512 | Fungi     | Ascomycota    | Eurotiomycetes  |                | Eurotiales        | Aspergillaceae |                         |
|                         | OTU_266  | Fungi     | unidentified  | unidentified    |                |                   |                |                         |
|                         | OTU_278  | Fungi     | Basidiomycota | Agaricomycetes  | Cantharellales | Ceratobasidiaceae |                |                         |
|                         | OTU_323  | Alveolata | Ciliophora    |                 |                |                   |                |                         |
|                         | OTU_554  | Alveolata | Ciliophora    |                 |                |                   |                |                         |
|                         | OTU_617  | Rhizaria  | Cercozoa      |                 |                |                   |                |                         |
|                         | OTU_674  | Fungi     | Ascomycota    |                 |                |                   |                |                         |
|                         | OTU_781  | Fungi     |               |                 |                |                   |                |                         |
|                         | OTU_807  | Fungi     |               |                 |                |                   |                |                         |
|                         | OTU_983  | Alveolata | Ciliophora    | Spirotrichea    | Urostylida     | Holostichidae     | Anteholosticha | Anteholosticha_sp       |
| Rot-conducive variety   | OTU_117  | Fungi     | Ascomycota    | Eurotiomycetes  |                |                   |                |                         |
|                         | OTU_132  | Fungi     | Ascomycota    | Sordariomycetes | Hypocreales    | unidentified      | unidentified   | Hypocreales_sp          |
|                         | OTU_16   | Fungi     |               |                 |                |                   |                |                         |
|                         | OTU_162  | Fungi     | Rozellomycota | unidentified    | unidentified   | unidentified      | unidentified   | Rozellomycota_sp        |
|                         | OTU_172  | Fungi     | Ascomycota    | Sordariomycetes |                |                   |                |                         |
|                         | OTU_177  | Fungi     | Ascomycota    | Eurotiomycetes  | Eurotiales     |                   |                |                         |
|                         | OTU_383  | Fungi     | Ascomycota    | Eurotiomycetes  | Eurotiales     | Aspergillaceae    | Aspergillus    | Aspergillus_thesauricus |
|                         | OTU_8    | Fungi     | Ascomycota    | Sordariomycetes | Sordariales    |                   |                |                         |
|                         | OTU_91   | Fungi     | Ascomycota    | Sordariomycetes | Microascales   | Microascaceae     | Kernia         | Kernia_sp               |

Table S4. The keystone taxa of in endophytic bacteria in root of different varieties

|                         |          | Phylum              | Class               | Order               | Family               | Genus            | Species                            |
|-------------------------|----------|---------------------|---------------------|---------------------|----------------------|------------------|------------------------------------|
| Rot-suppressive variety | OTU_102  | Proteobacteria      | Gammaproteobacteria | Alteromonadales     | Idiomarinaceae       | Aliidiomarina    |                                    |
|                         | OTU_103  | Proteobacteria      | Alphaproteobacteria | Rhodobacterales     | Rhodobacteraceae     | Paracoccus       |                                    |
|                         | OTU_1314 | Actinobacteria      | Thermoleophilia     | Solirubrobacterales | Solirubrobacteraceae |                  |                                    |
|                         | OTU_160  | Bacteroidetes       | Bacteroidia         | Cytophagales        | Microscillaceae      | uncultured       |                                    |
|                         | OTU_166  | Actinobacteria      | Thermoleophilia     | Gaiellales          | uncultured           |                  |                                    |
|                         | OTU_182  | Bacteroidetes       | Bacteroidia         | Sphingobacteriales  | Sphingobacteriaceae  | Sphingobacterium | Sphingobacterium_gobiense          |
|                         | OTU_19   | Proteobacteria      | Alphaproteobacteria | Sphingomonadales    | Sphingomonadaceae    | Novosphingobium  |                                    |
|                         | OTU_37   | Actinobacteria      | Actinobacteria      | Propionibacteriales | Nocardiodaceae       | Nocardioides     | Nocardioides_sp._RCML-51           |
|                         | OTU_38   | Actinobacteria      | Actinobacteria      | Pseudonocardiales   | Pseudonocardiaceae   | Lechevalieria    | Saccharothrix_sp._sj68             |
|                         | OTU_52   | Bacteroidetes       | Bacteroidia         | Chitinophagales     | Chitinophagaceae     |                  |                                    |
|                         | OTU_74   | Proteobacteria      | Alphaproteobacteria | Rhizobiales         | Beijerinckiaceae     | Methylobacterium |                                    |
|                         | OTU_92   | Deinococcus-Thermus | Deinococci          | Deinococcales       | Trueperaceae         | Truepera         | uncultured_Deinococcales_bacterium |
| Rot-conducive variety   | OTU_96   | Proteobacteria      | Alphaproteobacteria | Rhizobiales         | Methylophilaceae     |                  |                                    |
|                         | OTU_142  | Actinobacteria      | Actinobacteria      | Propionibacteriales | Nocardiodaceae       | Aeromicrobium    |                                    |
|                         | OTU_86   | Actinobacteria      | Actinobacteria      | Propionibacteriales | Nocardiodaceae       | Nocardioides     | Nocardioides_bigeumensis           |
|                         | OTU_87   | Actinobacteria      | Actinobacteria      | Glycomycetales      | Glycomycetaceae      | uncultured       | uncultured_bacterium               |

Table S5. The keystone taxa of in endophytic fungi in root of different varieties

|                         |         | Phylum          | Class                 | Order             | Family               | Genus               | Species                     |
|-------------------------|---------|-----------------|-----------------------|-------------------|----------------------|---------------------|-----------------------------|
| Rot-suppressive variety | OTU_157 | Ascomycota      | Saccharomycetes       | Saccharomycetales | unidentified         | unidentified        | Saccharomycetales_sp        |
|                         | OTU_171 | Basidiomycota   | Malasseziomycetes     | Malasseziales     | Malasseziaceae       | Malassezia          | Malassezia_globosa          |
|                         | OTU_197 | Ascomycota      | Sordariomycetes       | Hypocreales       | Nectriaceae          | Dactylonectria      | Dactylonectria_anthuriicola |
|                         | OTU_58  | Chytridiomycota | Rhizophlyctidomycetes | Rhizophlyctidales | Rhizophlyctidaceae   | Rhizophlyctis       | Rhizophlyctis_rosea         |
|                         | OTU_66  | Ascomycota      | Eurotiomycetes        | Eurotiales        | Aspergillaceae       | Aspergillus         |                             |
|                         | OTU_69  | Basidiomycota   | Malasseziomycetes     | Malasseziales     | unidentified         | unidentified        | Malasseziales_sp            |
|                         | OTU_157 | Ascomycota      | Saccharomycetes       | Saccharomycetales | unidentified         | unidentified        | Saccharomycetales_sp        |
|                         | OTU_171 | Basidiomycota   | Malasseziomycetes     | Malasseziales     | Malasseziaceae       | Malassezia          | Malassezia_globosa          |
|                         | OTU_197 | Ascomycota      | Sordariomycetes       | Hypocreales       | Nectriaceae          | Dactylonectria      | Dactylonectria_anthuriicola |
| Rot-conducive variety   | OTU_152 | Basidiomycota   | Microbotryomycetes    | Sporidiobolales   | Sporidiobolaceae     | Sporobolomyces      | Sporobolomyces_roseus       |
|                         | OTU_159 | Basidiomycota   |                       |                   |                      |                     |                             |
|                         | OTU_177 | Basidiomycota   | Tremellomycetes       | Trichosporonales  | Trichosporonaceae    | Cutaneotrichosporon |                             |
|                         | OTU_290 | Ascomycota      | Sordariomycetes       | Hypocreales       | Cordycipitaceae      |                     |                             |
|                         | OTU_313 | Ascomycota      |                       |                   |                      |                     |                             |
|                         | OTU_42  | Ascomycota      | Dothideomycetes       | Capnodiales       | Mycosphaerellaceae   |                     |                             |
|                         | OTU_49  | Ascomycota      | Sordariomycetes       | Hypocreales       | Ophiocordycipitaceae | Ophiocordyceps      |                             |
|                         | OTU_56  | Ascomycota      | Eurotiomycetes        | Chaetothyriales   |                      |                     |                             |
|                         | OTU_59  | Ascomycota      | Sordariomycetes       | Hypocreales       | Ophiocordycipitaceae |                     |                             |
|                         | OTU_91  | Basidiomycota   | Agaricomycetes        | Agaricales        | Tricholomataceae     | Tricholoma          | Tricholoma_matsutake        |
|                         | OTU_96  | Ascomycota      | Leotiomycetes         | Helotiales        | unidentified         | unidentified        | Helotiales_sp               |

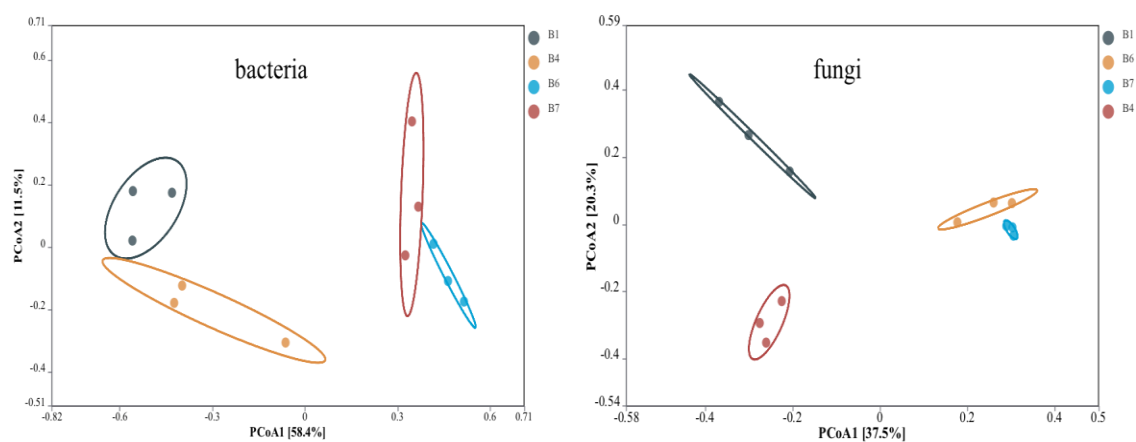

**Figure S1.** PCoA of the bacterial and fungal communities of bulk soil across the different varieties (1,6 indicate the rot-conductive variety; 4,7 indicate the rot-suppressive variety) and farming modes (1,4 belong to monoculture mode; 6,7 belong to rotation mode).
